# Supplementary material for: Sororin actively maintains sister chromatid cohesion
Source: PubMed Central journal article supplement (PMC4801952; doi:10.15252/embj.201592532), 2016-02-22
Supplement: EMBJ-35-635-s002.pdf [file EMBJ-35-635-s002.pdf]

## Expanded View Figures

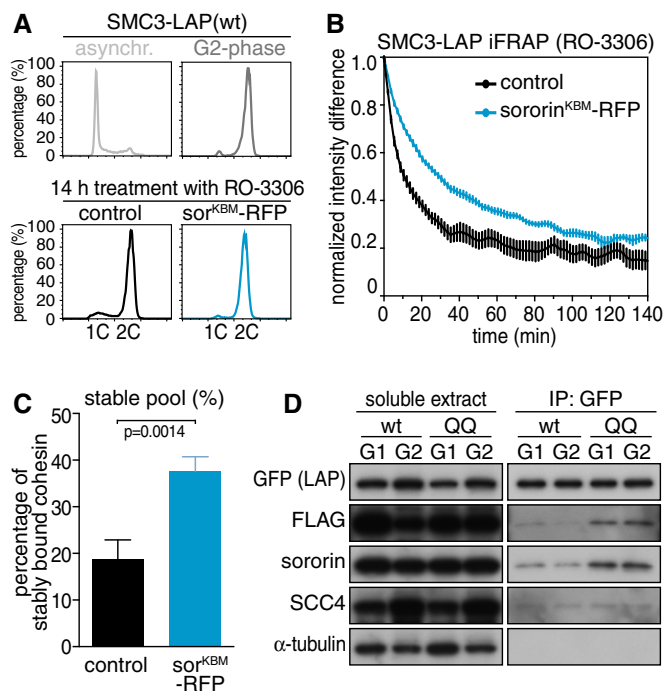

**Figure EV1. Sororin cannot stabilize cohesin–chromatin interactions before DNA replication (related to Fig 3).**

- A** FACS profile of propidium iodide-stained SMC3-LAP(wt) cells after double thymidine arrest, release into fresh medium for 6 h (G2-phase) and subsequent addition of RO-3306 (9 μM final conc.) to inhibit CDK1 activity. Sororin<sup>KBM</sup>-RFP plasmid transfection was performed at the time of RO-3306 addition. Please note that the sororin<sup>KBM</sup>-FLAG construct was modified so that the FLAG tag was replaced by monomeric red fluorescent protein (RFP).
- B** Graph depicting normalized iFRAP intensity of SMC3-LAP(wt) after prolonged G2-phase by CDK1 inhibition and transfection with plasmid as indicated. Error bars denote s.e.m.,  $n > 10$  cells per condition.
- C** Quantification of stably chromatin-bound SMC3-LAP in RO-3306-treated cells after transfection with sororin<sup>KBM</sup>-RFP. Error bars denote s.e.m.,  $n > 10$  cells per condition. Unpaired *t*-test was used to compare conditions.
- D** Western blot showing fractionated soluble extracts after immunoprecipitation with GFP antibody. SMC3-LAP(wt) and (QQ) cells were transfected with sor<sup>KBM</sup>-FLAG and synchronized in G1 or G2-phase.

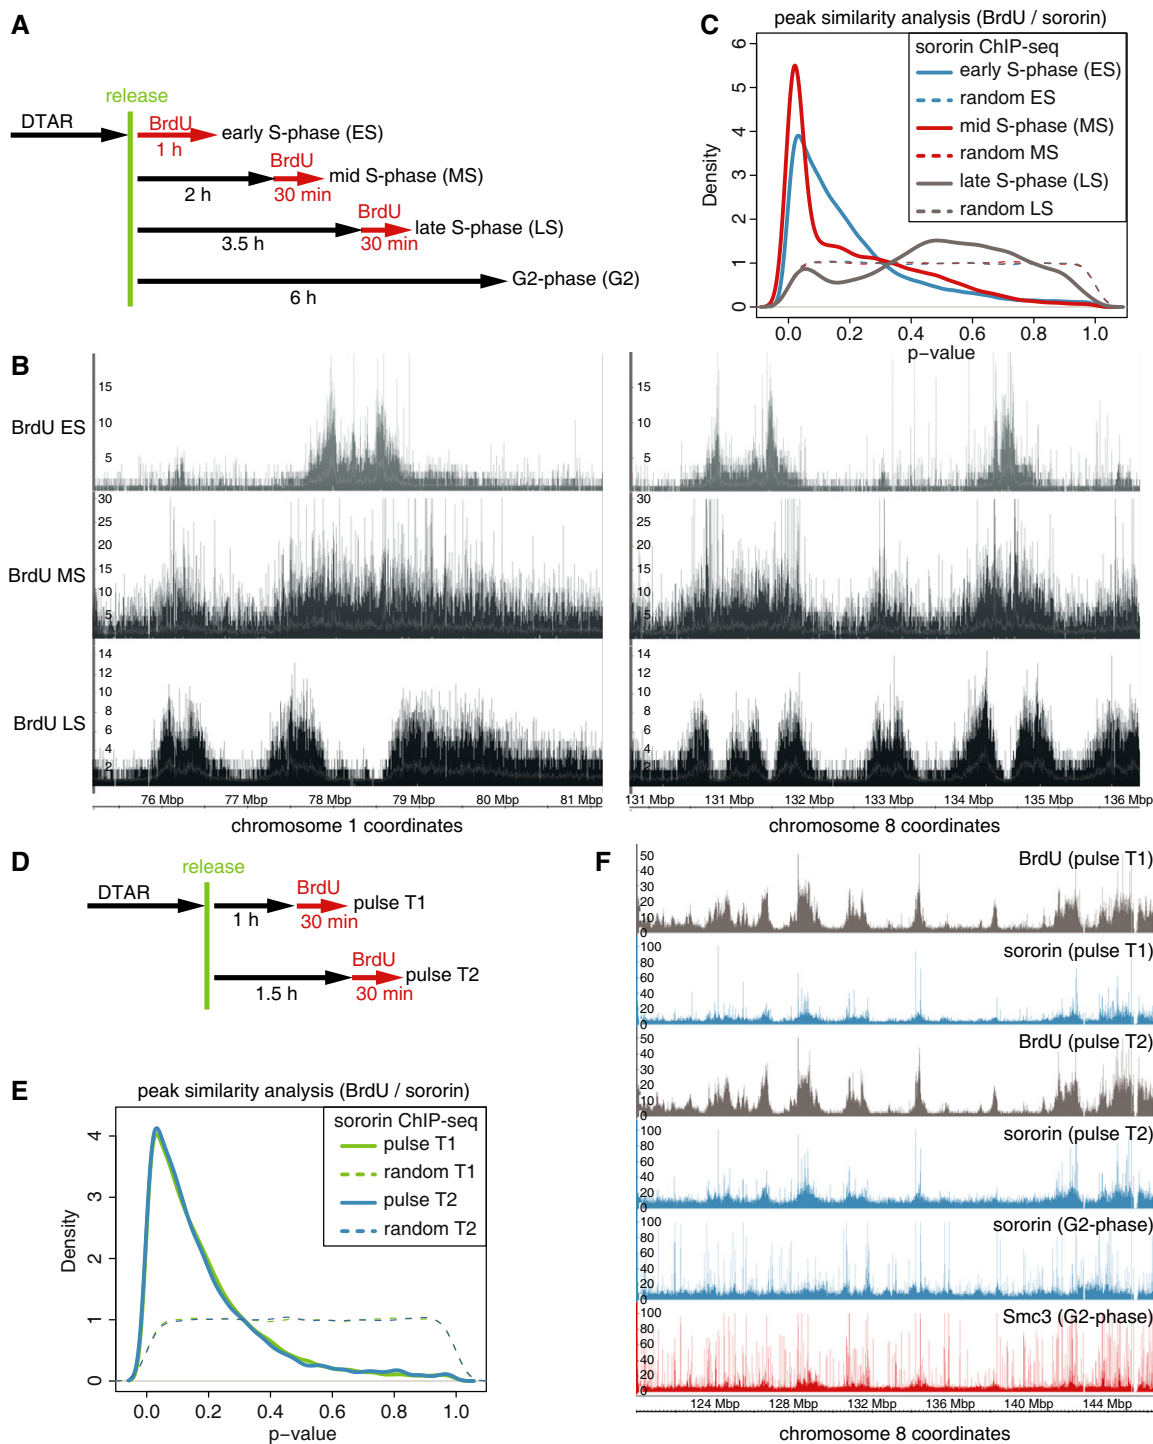

**Figure EV2. The genome-wide association of sororin with cohesin occurs exclusively on replicated DNA (related to Fig 4).**

- A Experimental setup used to synchronize HeLa cells in different states of DNA replication after double thymidine arrest–release (DTAR).
- B Examples of BrdU sequencing enrichment in early, mid-, and late S-phase. Please note the differences in y-axis scale between different time points. The varying sequencing enrichment possibly represents differences in population-wide replication dynamics.
- C Quantification of the co-occupancy of BrdU incorporation and sororin localization in early, mid-, and late S-phase depicted as P-value distributions and compared to randomized controls. Please note that in late S-phase, the co-occupancy between sororin and BrdU is low, presumably because a large part of the genome was replicated and bound by sororin before the BrdU pulse.
- D Experimental setup to synchronize HeLa cells at two time points corresponding to early S-phase.
- E Graph depicting the co-occupancy of BrdU and sororin at S-phase time points t1 and t2.
- F Examples of sororin and SMC3 ChIP-seq and BrdU DIP-seq data from early S-phase as compared to G2-phase.

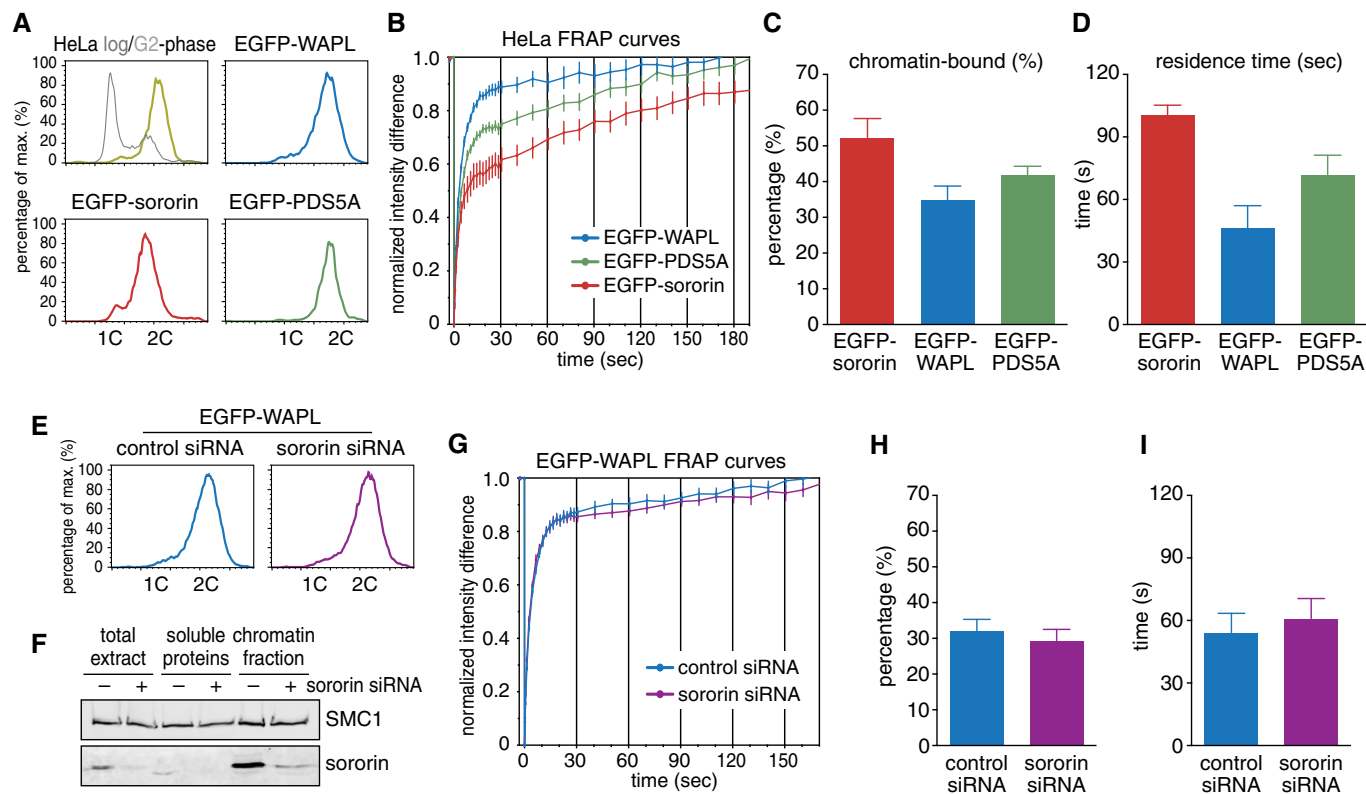

**Figure EV3. Sororin, PDS5A, and WAPL turn over rapidly on chromatin (related to Fig 7).**

A–D The regulatory cohesin binding proteins sororin, WAPL, and PDS5A associate dynamically with chromatin in HeLa cells. (A) FACS profile of propidium iodide-stained EGFP-sororin, EGFP-WAPL, and EGFP-PDS5A HeLa cells synchronized in G2-phase. Genes were homozygously tagged at endogenous loci by CRISPR-mediated homologous recombination. (B) FRAP profiles of sororin, WAPL, and PDS5A in G2-phase synchronized HeLa cells. Error bars denote s.e.m.,  $n = 15$  cells per condition. (C) Quantification of the relative abundance of sororin, WAPL, and PDS5A on chromatin as derived by curve fitting data in (B). Error bars denote s.e.m.,  $n = 15$  cells per condition. (D) Quantification of the mean residence time of sororin, WAPL, and PDS5A on chromatin. Error bars denote s.e.m.,  $n = 15$  cells per condition.

E–I Turnover of WAPL on chromatin in G2-phase is not detectably reduced by depletion of sororin. (E) FACS profiles of propidium iodide-stained EGFP-WAPL cells after siRNA transfection and synchronization in G2-phase. (F) Western blot showing whole-cell, soluble protein, and chromatin extracts of EGFP-WAPL HeLa cells after treatment with sororin or control siRNAs. SMC1 levels were used as a loading control. (G) FRAP profiles of EGFP-WAPL HeLa cells in G2-phase after siRNA treatment. Error bars denote s.e.m.,  $n > 14$ . (H) Quantification of the relative abundance of WAPL on chromatin after sororin RNAi. Error bars denote s.e.m.,  $n > 14$ . (I) Quantification of the chromatin residence time of WAPL after sororin RNAi. Error bars denote s.e.m.,  $n > 14$ .

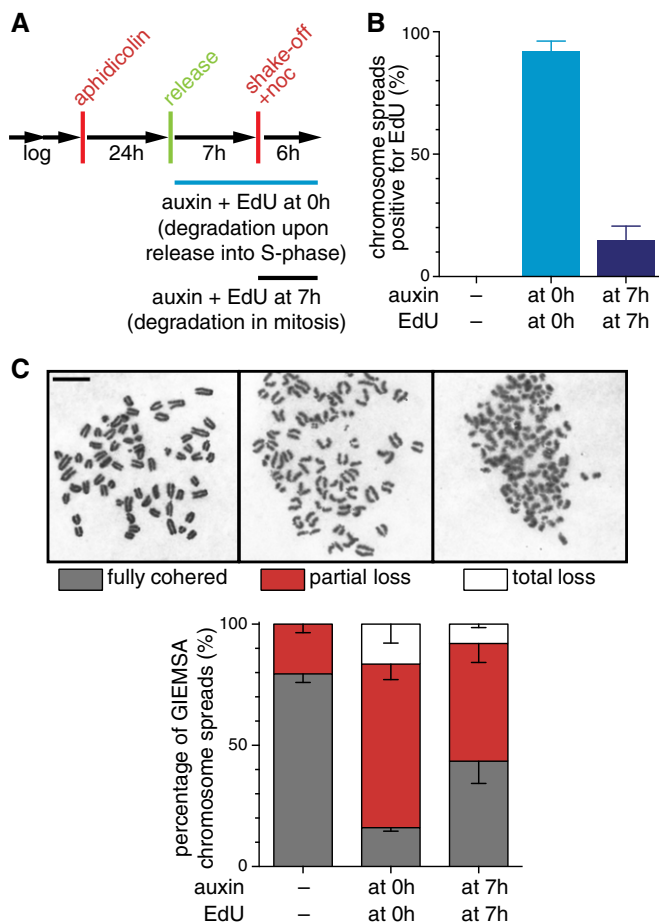

**Figure EV4. Sororin is a cohesion maintenance factor (related to Fig 8).**

**A** Experimental setup used for cell synchronization, auxin, and EdU treatment of *Cdca5*  $\Delta/\Delta$  sor-LAP-AID F-box mouse embryonic fibroblasts. Shake-off was used to enrich for mitotic cells.

**B** Quantification of EdU-labeled prometaphase cells after treating cells with auxin and EdU at the indicated time points. Please note that although shake-off was used to enrich for mitotic cells, 15% of cells still incorporated EdU in this population. Error bars denote s.d.,  $n = 200$  cells per condition.

**C** Examples and analysis of chromosome spreads after auxin treatment and Giemsa staining. Scale bar, 10  $\mu$ m. Error bars denote s.d.,  $n = 200$  cells per condition.
